# Supplementary material
Source: PubMed Central journal article supplement (PMC5762983)
Supplement: mmc1.pdf [file mmc1.pdf]

YMTHE, Volume 26

## **Supplemental Information**

### **In Vivo Selection of a Computationally Designed SCHEMA AAV Library Yields a Novel Variant for Infection of Adult Neural Stem Cells in the SVZ**

**David S. Ojala, Sabrina Sun, Jorge L. Santiago-Ortiz, Mikhail G. Shapiro, Philip A. Romero, and David V. Schaffer**

## SUPPLEMENTARY INFORMATION

**Figure S1.** Inversion of *cap* in recombinase deficient Sure2 *E. coli* was detectable by PCR but not restriction digest. *Lox66* and *lox71* sites flanking stuffer sequences of 83, 95, 110, or 125 base pairs were cloned between the *XhoI* and *KpnI* sites of pSub2RepKO. Constructs were transformed into competent *E. coli* expressing Cre recombinase (StrataClone) or recombinase-deficient Sure2 (Agilent), plasmid DNA was purified, and PCR was performed to amplify inverted genomes. Inverted amplicons were observed for both bacterial strains, indicating low levels of recombination that could lead to false positives during selections. Recombination was not detected by restriction digest.

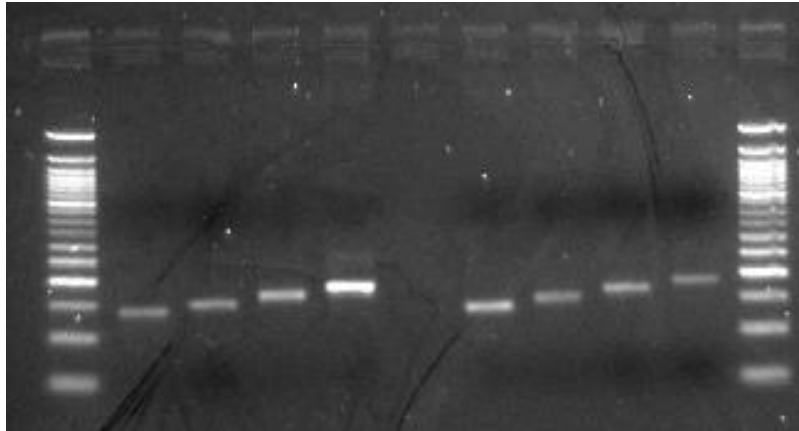

| Lane   | 1                             | 2                    | 3                    | 4                     | 5                     | 6 | 7                                          | 8                                          | 9                                           | 10                                          | 11                            |
|--------|-------------------------------|----------------------|----------------------|-----------------------|-----------------------|---|--------------------------------------------|--------------------------------------------|---------------------------------------------|---------------------------------------------|-------------------------------|
| Sample | 50 bp DNA Ladder (NEB N3236L) | 83 bp stuffer, Cre + | 95 bp stuffer, Cre + | 110 bp stuffer, Cre + | 125 bp stuffer, Cre + |   | 83 bp stuffer, recombinase deficient Sure2 | 95 bp stuffer, recombinase deficient Sure2 | 110 bp stuffer, recombinase deficient Sure2 | 125 bp stuffer, recombinase deficient Sure2 | 50 bp DNA Ladder (NEB N3236L) |

**Figure S2.** SCH9 and SCH2 *cap* amino acid sequences.

SCH9:

MAADGYLPDWLEDNLSEGIREWWDLKPGAPKPKANQQKQDDGRGLVLPGYKYLGPFNGL  
DKGEPVNAADAAALEHDKAYDQQLKAGDNPYLRYNHADADEFQERLQEDTSFGGNLGRAV  
FQAKKRVLEPLGLVEEAAKTAPGKKRPVEQSPQEPDSSAGIGKSGAQPAKKRLNFGQTGDT  
ESVPDPQPIGEPPAAPSGVGSALTMASGGGAPVADNNEGADGVGSSSGNWHCDSQWLGDRI  
TTSTRTWALPTYNNHLYKQISNSTSGGSSNDNAYFGYSTPWGYFDNRFHCHFSRWDQRLLI  
NNNWGFRPKRLSFKLFNIQVKEVTQNEGTKTIANNLTSTIQVFTDSYQLPYVLGSAHEGCL  
PPFPADVFMIPQYGYLTLNDGSQAVGRSSFYCLEYFPSQMLRTGNNFQFSYEFENVPFHSSY  
AHSQSLDRLMNPLIDQYLYLSKTINGSGQNQQTLKFSVAGPSNMAVQGRNWLPGPCYRQ  
QRVSKTSADNNNSEYSWTGATKYHLNGRDSL VNPGPAMASHKDDEEKFFPQSGVLIFGKQ  
GSEKTNVDIEKVMITDEEEIRTTNPVATEQYGSVSTNLQRGNRQAATADVNTQGVLPGMVW  
QDRDVYLQGPIWAKIPHTDGNFHPSPLMGGFGMKHPPPQILIKNTPVPADPPTAFNKDKLNS  
FITQYSTGQVSVEIEWELQKENS KRWNPEIQYTSNYYKSNNVEFAVNTEGVYSEPRPIGTRY  
LTRNL

SCH2:

MAADGYLPDWLEDNLSEGIREWWDLKPGAPKPKANQQKQDDGRGLVLPGYKYLGPFNGL  
DKGEPVNAADAAALEHDKAYDQQLKAGDNPYLRYNHADADEFQERLQEDTSFGGNLGRAV  
FQAKKRVLEPLGLVEEAAKTAPGKKRPVEQSPQEPDSSAGIGKSGAQPAKKRLNFGQTGDT  
ESVPDPQPIGEPPAAPSGVGSALTMASGGGAPVADNNEGADGVGSSSGNWHCDSQWLGDRI  
TTSTRTWALPTYNNHLYKQISNSTSGGSSNDNAYFGYSTPWGYFDNRFHCHFSRWDQRLLI  
NNNWGFRPKRLSFKLFNIQVKEVTQNEGTKTIANNLTSTIQVFTDSYQLPYVLGSAHEGCL  
PPFPADVFMIPQYGYLTLNDGSQAVGRSSFYCLEYFPSQMLRTGNNFQFSYTFEDVPFHSSY  
AHSQSLDRLMNPLIDQYLYLSRTNTPSGTTTQSRLQFSQAGASDIRDQSRNWLPGPCYRQQ  
RVSKTSADNNNSEYSWTGATKYHLNGRDSL VNPGPAMASHKDDEEKFFPQSGVLIFGKQGS  
EKTNDIEKVMITDEEEIRTTNPVATEQYGSVSTNLQRGNRQAATADVNTQGVLPGMVWQ  
DRDVYLQGPIWAKIPHTDGNFHPSPLMGGFGMKHPPPQILIKNTPVPADPPTAFNKDKLNSFI  
TQYSTGQVSVEIEWELQKENS KRWNPEIQYTSNYYKSNNVEFAVNTEGVYSEPRPIGTRYLT  
RNL

**Figure S3.** Alignment of the SCH9 and SCH2 AAV *cap* amino acid sequences with the parent AAV serotypes. Capsid sequences were aligned using the Geneious program (Biomatters). Colored amino acids represent differences relative to the reference SCH9 *cap* sequence. Amino acids involved in heparin or galactose binding are annotated in green and blue, respectively, above the SCH9 sequence.

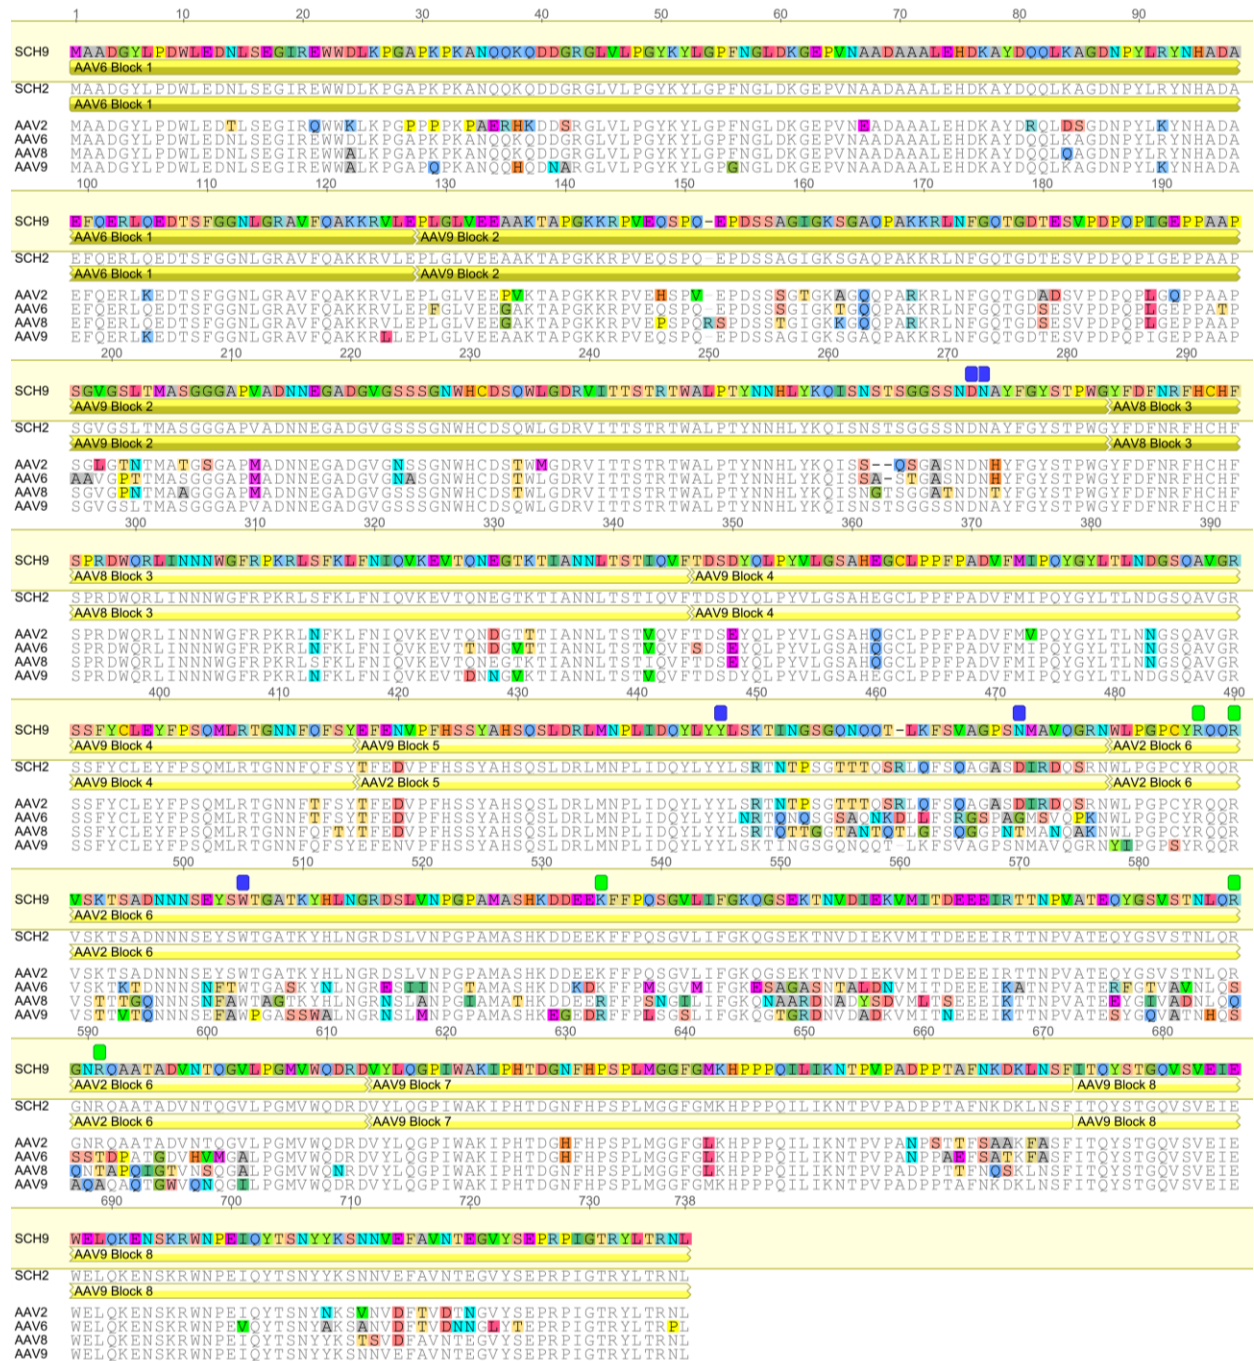

**Figure S4.** Viral genomic yield of recombinant self-complementary AAV vectors. Data are normalized to the cell culture surface area and are presented as mean  $\pm$  SD, n=3.

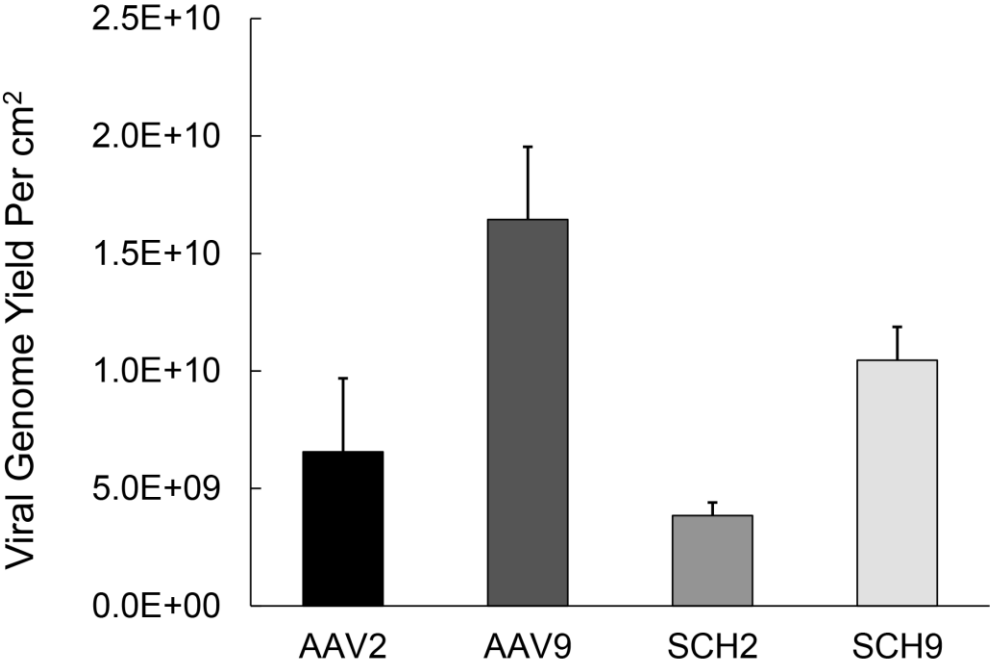

**Figure S5.** GFP expression in the cerebellum three weeks after unilateral injection of recombinant AAV1 or SCH9 into the deep cerebellar nuclei. Coronal sections were stained for GFP (green) and the Purkinje cell marker calbindin (purple). Scale bars indicate 500  $\mu\text{m}$ .

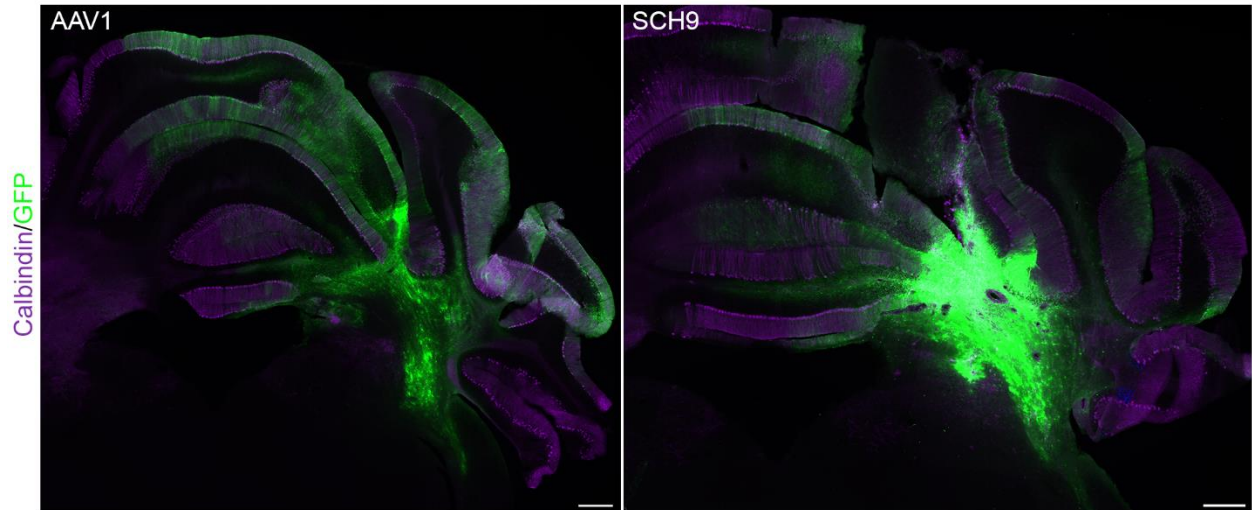

**Figure S6.** Confocal analysis of GFP expression in the striatum three weeks after injection of recombinant AAV1 or SCH9. Coronal sections were stained for GFP (green), the astrocyte marker GFAP (red), and the neuronal marker NeuN (magenta). Scale bars indicate 25  $\mu$ m. Image analysis was performed by counting colocalized cells in ImageJ (over 225 cells counted per mouse).

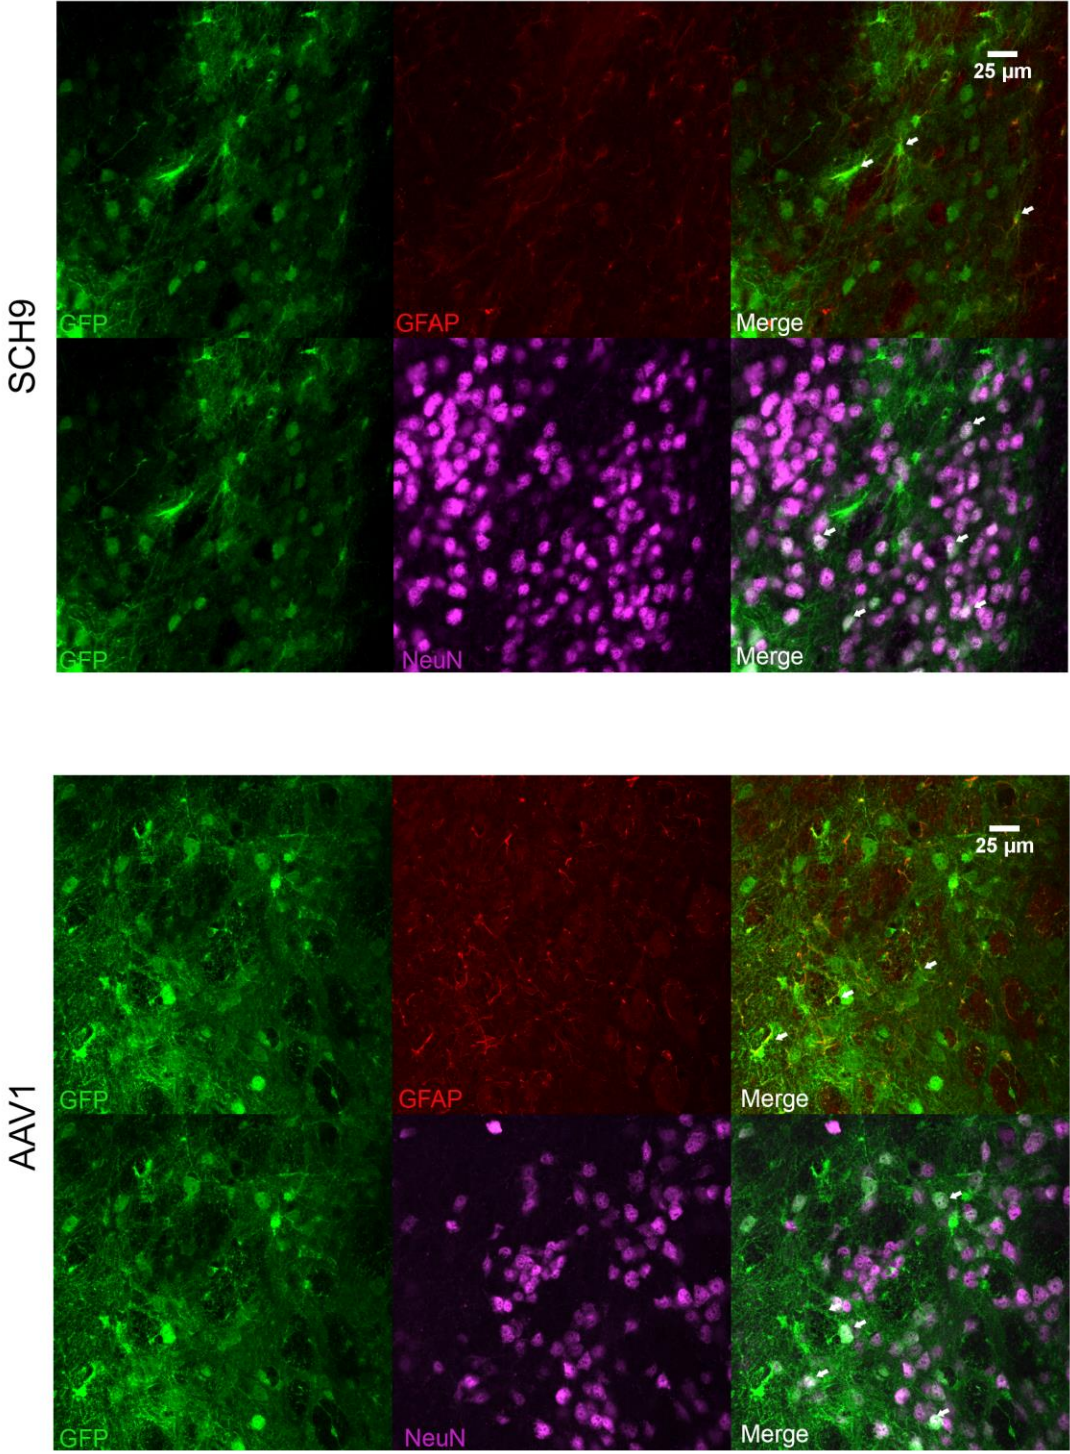

**Figure S7.** SCH2 and SCH9 are unable to infect a HeLa AAVR knockout cell line. The infectivity of SCH2 and SCH9 was compared with AAV2, a control that is known to utilize AAVR. All three variants efficiently transduce wild type HeLa cells, but not the AAVR knockout line. Data are presented as mean  $\pm$  SEM, n = 6. \*, statistical difference of P < 0.005 by two-tailed Student's t-test.

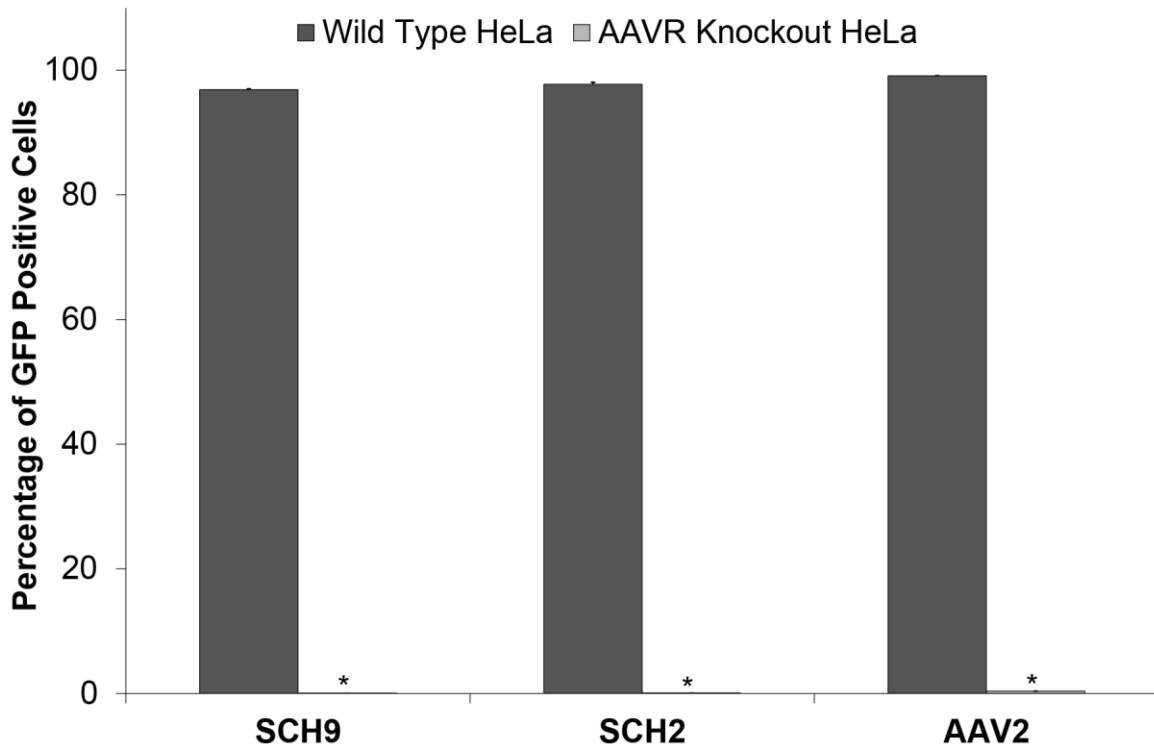



**Table S1.** Neutralizing IVIG titers of SCH9 and the parent serotypes from which it is derived. The neutralizing titers represent the first IVIG concentration at which 50% or greater reduction in GFP expression was observed.

| <b>Variant</b> | <b>Neutralizing IVIG Concentration<br/>(mg/mL)</b> | <b>SCH9 Fold Improvement</b> |
|----------------|----------------------------------------------------|------------------------------|
| SCH9           | 0.20                                               | N/A                          |
| AAV2           | 0.10                                               | 2                            |
| AAV6           | 0.10                                               | 2                            |
| AAV8           | 0.10                                               | 2                            |
| AAV9           | 0.02                                               | 10                           |

**Table S2.** Primer sequences used in this study to design constructs and amplify the AAV *cap* gene.

| <b>Primer name</b> | <b>Primer sequence (5'-3')</b>                                                                      |
|--------------------|-----------------------------------------------------------------------------------------------------|
| QC_pBluescript_Fwd | GCTGCAATGATACCGCGAAACCCACGCTC                                                                       |
| QC_pBluescript_Rev | GAGCGTGGGTTTCGCGGTATCATTGCAGC                                                                       |
| QC_AAV4_Fwd        | GCTCCTGGAAAGAAGAGGCCGTTGATTGAATCCCC                                                                 |
| QC_AAV4_Rev        | GGGGATTCAATCAACGGCCTCTTCTTTCCAGGAGC                                                                 |
| QC_AAV5_Fwd        | GACCCGGAAACGGACTCGATCGAGGAG                                                                         |
| QC_AAV5_Rev        | CTCCTCGATCGAGTCCGTTTCCGGGTC                                                                         |
| QC_AAV6_Fwd        | GTTTAGCCGGGGCTCTCCAGCTGGC                                                                           |
| QC_AAV6_Rev        | GCCAGCTGGAGAGCCCCGGCTAAAC                                                                           |
| QC_AAV8_Fwd        | CTCCTGGAAAGAAGAGGCCGGTAGAGCCATCAC                                                                   |
| QC_AAV8_Rev        | GTGATGGCTCTACCGGCCTCTTCTTTCCAGGAG                                                                   |
| BglIIIFwd          | CAAGCGGCCGCGTAAGCTTAGATCTCTGACGTCGATGGCTG<br>CG                                                     |
| BglIIRev           | CGCAGCCATCGACGTCAGAGATCTAAGCTTACGCGGCCGCT<br>TG                                                     |
| Lox66Fwd           | GATCTATAACTTCGTATAGCATAACATTATACGAACGGTACG                                                          |
| Lox66Rev           | CGTACCGTTCGTATAATGTATGCTATACGAAGTTATTTCTGA                                                          |
| XhoIFwd            | CCGCTTGTTAATCAATAAACCGTTTAATTTCGTTTCAGTTGAC<br>TCGAGGTCTCTGCGTATTTCTTTCT                            |
| XhoIRev            | AGAAAGAAATACGCAGAGACCTCGAGTCAACTGAAACGAA<br>TTAAACGGTTTATTGATTAACAAGCGG                             |
| KpnIFwd            | CGTAGATAAGTAGCATGGCGGGTTAATCAGGTACCACAAG<br>GAACCCCTAG                                              |
| KpnIRev            | CTAGGGGTTTCTTGTGGTACCTGATTAACCCGCCATGCTACT<br>TATCTACG                                              |
| SOELox71Fwd        | GTCAGCCTCGAGATAACTTCGTATAATGTATGCTATACGAA<br>CGGTACTGTGGTCGTCATTGGCAACTACACCTGTTCG                  |
| SOELox71Rev        | CGTCACGGTACCTGTGGAATTGTGAGCGCTCACAATTCCAC<br>AGCTAGCCTATTTACCGATACCACACGAACAGGTGTAGTTG<br>CCAATGACG |
| Lox71Fwd           | GTCAGCCTCGAGATAACTTCG                                                                               |
| Lox71Rev           | CGTCACGGTACCTGTGG                                                                                   |
| Cap_ISF            | CATGGAAACTAGATAAGAAAGA                                                                              |
| Cap_NSF            | GGTACGAAGCTTCGATCAACTACGCAG                                                                         |
| Cap_R              | AGCTAGCCTATTTACCGATAC                                                                               |
| Internal_Cap_ISF   | AAGTTCAACTGAAACGAATTA                                                                               |
| Internal_Cap_R     | CACACGAACAGGTGTAGTT                                                                                 |

**Table S3.** Primer sequences designed in j5 to amplify each sequence block for combinatorial golden gate assembly of the SCHEMA AAV library.

| Primer name                     | Primer sequence (5'-3')                      |
|---------------------------------|----------------------------------------------|
| DO_02_(Vector_Backbone)_forward | CACACCAGGTCTCATTGCGCGCTTGGCGTAATCATGG        |
| DO_03_(Vector_Backbone)_reverse | CACACCAGGTCTCATTATAGTGAGTCGTATTACCGCC        |
| DO_04_(AAV2_b1)_forward         | CACACCAGGTCTCAATAAGGCCAATTGGGTACCG           |
| DO_05_(AAV2_b1)_reverse         | CACACCAGGTCTCAGTTCAAGAACCCCTCTTTTCGC         |
| DO_06_(AAV2_b2)_forward         | CACACCAGGTCTCAGAACCCTCTGGGCTGGTTGAG          |
| DO_07_(AAV2_b2)_reverse         | CACACCAGGTCTCAACCCCAAGGGGTGCTGTAG            |
| DO_08_(AAV2_b3)_forward         | CACACCAGGTCTCAGGGTATTTTGACTCAACAGATTCCACTGC  |
| DO_09_(AAV2_b3)_reverse         | CACACCAGGTCTCAAAGACCTGAACCGTCTGG             |
| DO_10_(AAV2_b4)_forward         | CACACCAGGTCTCACTTTACTGACTCGGAGTACCAGC        |
| DO_11_(AAV2_b4)_reverse         | CACACCAGGTCTCAGTAGCTGAAGTTAAAGTTGTTCC        |
| DO_12_(AAV2_b5)_forward         | CACACCAGGTCTCACTACACTTTTGAGGACCTTCC          |
| DO_13_(AAV2_b5)_reverse         | CACACCAGGTCTCAAGTCTCTAGACTGGTCCCGAATG        |
| DO_14_(AAV2_b6)_forward         | CACACCAGGTCTCAAAGTGGCTCTCTGGACCTG            |
| DO_15_(AAV2_b6)_reverse         | CACACCAGGTCTCAGTCTCTGCTCGCAGACCATG           |
| DO_16_(AAV2_b7)_forward         | CACACCAGGTCTCAAGACGTGTACCTTACGGGGC           |
| DO_17_(AAV2_b7)_reverse         | CACACCAGGTCTCAATGAAGGAAGCAAACCTTTGCCG        |
| DO_18_(AAV2_b8)_forward         | CACACCAGGTCTCATCATCACACAGTACTCCACGG          |
| DO_19_(AAV2_b8)_reverse         | CACACCAGGTCTCAGCAAGCGCAATTAACCCCTC           |
| DO_20_(AAV4_b1)_reverse         | CACACCAGGTCTCAGTTCAAGAACCCCTCTTTTGGC         |
| DO_21_(AAV4_b2)_forward         | CACACCAGGTCTCAGAACCCTTGGTCTGGTTGAG           |
| DO_22_(AAV4_b2)_reverse         | CACACCAGGTCTCAACCCCAAGGGGTGGAGAAT            |
| DO_23_(AAV4_b3)_forward         | CACACCAGGTCTCAGGGTATTTTGACTTCAACCGCTTCC      |
| DO_24_(AAV4_b3)_reverse         | CACACCAGGTCTCAAAGATCTGAACCGTCTGG             |
| DO_25_(AAV4_b4)_forward         | CACACCAGGTCTCACTTTGCGGACTGCTGTACC            |
| DO_26_(AAV4_b4)_reverse         | CACACCAGGTCTCAGTAGGTAAATTTCAAAGTTGTTGCC      |
| DO_27_(AAV4_b5)_forward         | CACACCAGGTCTCACTACAGTTTGGAGAAGGTGCCT         |
| DO_28_(AAV4_b5)_reverse         | CACACCAGGTCTCAAGTCTCTTTTAAAGTTGGAAAAGTTGGT   |
| DO_29_(AAV4_b6)_forward         | CACACCAGGTCTCAAAGTGGCTCCCGGGCTTCC            |
| DO_30_(AAV4_b6)_reverse         | CACACCAGGTCTCAGTCTCTGTTTGGCAGACCATC          |
| DO_31_(AAV4_b7)_forward         | CACACCAGGTCTCAAGACATTTACTACAGGGTCCC          |
| DO_32_(AAV4_b7)_reverse         | CACACCAGGTCTCAATGAAGGAGTTTACCGGAGTAGAG       |
| DO_33_(AAV4_b8)_forward         | CACACCAGGTCTCATCATTACTAGTACAGCACTGGC         |
| DO_34_(AAV4_b8)_reverse         | CACACCAGGTCTCAGCAAGCGCAATTAACCCCTACTAAAGG    |
| DO_35_(AAV5_b1)_reverse         | CACACCAGGTCTCAGTTGAGAACCCCTTTTCTTGGC         |
| DO_36_(AAV5_b2)_forward         | CACACCAGGTCTCAGAACCCTTTTGGCTGGTTGAA          |
| DO_37_(AAV5_b2)_reverse         | CACACCAGGTCTCAACCCCAAGGGGTGCTGTAT            |
| DO_38_(AAV5_b3)_forward         | CACACCAGGTCTCAGGGTATTTTGACTTAAACCGCTTCC      |
| DO_39_(AAV5_b3)_reverse         | CACACCAGGTCTCAAAGACTTGGACGGTGGAGG            |
| DO_40_(AAV5_b4)_forward         | CACACCAGGTCTCACTTTACGGACGACGACTACC           |
| DO_41_(AAV5_b4)_reverse         | CACACCAGGTCTCAGTAGGTAAACTCAAAGTTGTTGCC       |
| DO_42_(AAV5_b5)_forward         | CACACCAGGTCTCACTACAACCTTTGAGGAGGTGCC         |
| DO_43_(AAV5_b5)_reverse         | CACACCAGGTCTCAAGTCTTGTAGGTGTTGGGTATCTCC      |
| DO_44_(AAV5_b6)_forward         | CACACCAGGTCTCAAAGTGGTCCCGGGCCCTAT            |
| DO_45_(AAV5_b6)_reverse         | CACACCAGGTCTCAGTCTCTCCATCCACACCC             |
| DO_46_(AAV5_b7)_forward         | CACACCAGGTCTCAAGACGTGTACCTCAAAGGACC          |
| DO_47_(AAV5_b7)_reverse         | CACACCAGGTCTCAATGAAGTGTGACGGGCAC             |
| DO_48_(AAV5_b8)_forward         | CACACCAGGTCTCATCATCACCCAGTACAGACC            |
| DO_49_(AAV6_b1)_reverse         | CACACCAGGTCTCAGTTGAGAACCCCTCTCTTGG           |
| DO_50_(AAV6_b2)_forward         | CACACCAGGTCTCAGAACCCTTTGGTCTGGTTGAGG         |
| DO_51_(AAV6_b2)_reverse         | CACACCAGGTCTCAACCCCAAGGGGTGCTGTAGC           |
| DO_52_(AAV6_b3)_forward         | CACACCAGGTCTCAGGGTATTTTGATTTCAACAGATTCCACTGC |
| DO_53_(AAV6_b3)_reverse         | CACACCAGGTCTCAAAGACTTGAACCGTCTGG             |
| DO_54_(AAV6_b4)_forward         | CACACCAGGTCTCACTTTGCGGACTCGGAGTACC           |
| DO_55_(AAV6_b4)_reverse         | CACACCAGGTCTCAGTAGCTGAAGTTAAAGTTATTGCC       |
| DO_56_(AAV6_b5)_forward         | CACACCAGGTCTCACTACACCTTCGAGGACGTGC           |
| DO_57_(AAV6_b5)_reverse         | CACACCAGGTCTCAAGTCTTTGGGCTGAACAGCATGC        |
| DO_58_(AAV6_b6)_forward         | CACACCAGGTCTCAAAGTGGTACTCGGACCCCTG           |
| DO_59_(AAV6_b6)_reverse         | CACACCAGGTCTCAGTCTCTGCTTGGCACCATTTC          |
| DO_60_(AAV6_b7)_forward         | CACACCAGGTCTCAAGACGTATACCTGACGGGTCC          |
| DO_61_(AAV6_b7)_reverse         | CACACCAGGTCTCAATGAATGAAGCAAACCTTTGTAGCC      |
| DO_62_(AAV6_b8)_forward         | CACACCAGGTCTCATCATCACCCAGTATCCACAGG          |
| DO_63_(AAV8_b1)_reverse         | CACACCAGGTCTCAGTTGAGAACCCCTCTCTTGG           |
| DO_64_(AAV8_b2)_forward         | CACACCAGGTCTCAGAACCCTCTGGTCTGGTTGAG          |
| DO_65_(AAV8_b2)_reverse         | CACACCAGGTCTCAACCCCAAGGGGTGCTGTAG            |
| DO_66_(AAV8_b3)_forward         | CACACCAGGTCTCAGGGTATTTGACTTTAACAGATTCCACTGC  |
| DO_67_(AAV8_b3)_reverse         | CACACCAGGTCTCAAAGACCTGGATGGTCTGG             |
| DO_68_(AAV8_b4)_forward         | CACACCAGGTCTCACTTTACGGACTCGGAGTACC           |
| DO_69_(AAV8_b4)_reverse         | CACACCAGGTCTCAGTAGGTAAACTGGAAAGTTGTTGC       |
| DO_70_(AAV8_b5)_reverse         | CACACCAGGTCTCAAGTCTTCTGCTGATTGGCC            |
| DO_71_(AAV8_b6)_forward         | CACACCAGGTCTCAAAGTGGTCCAGGACCCCTG            |
| DO_72_(AAV8_b6)_reverse         | CACACCAGGTCTCAGTCTGGTCTGCCAGACCATAC          |
| DO_73_(AAV8_b7)_forward         | CACACCAGGTCTCAAGACGTGTACTGCAGGGTCC           |
| DO_74_(AAV8_b7)_reverse         | CACACCAGGTCTCAATGAAGAGITCAGCTTTGACTGG        |
| DO_75_(AAV8_b8)_forward         | CACACCAGGTCTCATCATCACGCAATACAGCACCG          |
| DO_76_(AAV9_b1)_reverse         | CACACCAGGTCTCAGTTCAAGAACCTCTTTTGGC           |
| DO_77_(AAV9_b2)_forward         | CACACCAGGTCTCAGAACCCTTGGTCTGGTTGAGG          |
| DO_78_(AAV9_b3)_reverse         | CACACCAGGTCTCAAAGACCTGGACCGTCTGG             |
| DO_79_(AAV9_b4)_forward         | CACACCAGGTCTCACTTTACGGACTCAGACTATCAGC        |
| DO_80_(AAV9_b4)_reverse         | CACACCAGGTCTCAGTAGCTGAACCTGGAAAGTTGTTACC     |
| DO_81_(AAV9_b5)_forward         | CACACCAGGTCTCACTACGAGTTTGGAGAAGTACC          |
| DO_82_(AAV9_b5)_reverse         | CACACCAGGTCTCAAGTCTTCTCCCTGGACAGCC           |
| DO_83_(AAV9_b6)_forward         | CACACCAGGTCTCAAAGTACATACCTGGACCCAGC          |
| DO_84_(AAV9_b6)_reverse         | CACACCAGGTCTCAGTCTCTGCTGCCAAACCATACC         |
| DO_85_(AAV9_b7)_forward         | CACACCAGGTCTCAAGACGTGTACCTGCAAGGAC           |
| DO_86_(AAV9_b7)_reverse         | CACACCAGGTCTCAATGAAGAGTTCAGCTGTCTTGG         |
| DO_87_(AAV9_b8)_forward         | CACACCAGGTCTCATCATCACCCAGTATCTACTGGC         |

**Table S4.** PCR reactions for combinatorial golden gate cloning of the SCHEMA AAV library.

| Block ID Number | Primary Template | Forward Primer                  | Reverse Primer                  | Amplicon length (bp) |
|-----------------|------------------|---------------------------------|---------------------------------|----------------------|
| 0               | pBluescript SK + | DO_02_(Vector_Backbone)_forward | DO_03_(Vector_Backbone)_reverse | 2843                 |
| 1               | AAV2             | DO_04_(AAV2_b1)_forward         | DO_05_(AAV2_b1)_reverse         | 784                  |
| 2               | AAV2             | DO_06_(AAV2_b2)_forward         | DO_07_(AAV2_b2)_reverse         | 491                  |
| 3               | AAV2             | DO_08_(AAV2_b3)_forward         | DO_09_(AAV2_b3)_reverse         | 220                  |
| 4               | AAV2             | DO_10_(AAV2_b4)_forward         | DO_11_(AAV2_b4)_reverse         | 242                  |
| 5               | AAV2             | DO_12_(AAV2_b5)_forward         | DO_13_(AAV2_b5)_reverse         | 222                  |
| 6               | AAV2             | DO_14_(AAV2_b6)_forward         | DO_15_(AAV2_b6)_reverse         | 433                  |
| 7               | AAV2             | DO_16_(AAV2_b7)_forward         | DO_17_(AAV2_b7)_reverse         | 211                  |
| 8               | AAV2             | DO_18_(AAV2_b8)_forward         | DO_19_(AAV2_b8)_reverse         | 298                  |
| 9               | AAV4             | DO_04_(AAV2_b1)_forward         | DO_20_(AAV4_b1)_reverse         | 784                  |
| 10              | AAV4             | DO_21_(AAV4_b2)_forward         | DO_22_(AAV4_b2)_reverse         | 467                  |
| 11              | AAV4             | DO_23_(AAV4_b3)_forward         | DO_24_(AAV4_b3)_reverse         | 220                  |
| 12              | AAV4             | DO_25_(AAV4_b4)_forward         | DO_26_(AAV4_b4)_reverse         | 251                  |
| 13              | AAV4             | DO_27_(AAV4_b5)_forward         | DO_28_(AAV4_b5)_reverse         | 225                  |
| 14              | AAV4             | DO_29_(AAV4_b6)_forward         | DO_30_(AAV4_b6)_reverse         | 445                  |
| 15              | AAV4             | DO_31_(AAV4_b7)_forward         | DO_32_(AAV4_b7)_reverse         | 211                  |
| 16              | AAV4             | DO_33_(AAV4_b8)_forward         | DO_34_(AAV4_b8)_reverse         | 298                  |
| 17              | AAV5             | DO_04_(AAV2_b1)_forward         | DO_35_(AAV5_b1)_reverse         | 787                  |
| 18              | AAV5             | DO_36_(AAV5_b2)_forward         | DO_37_(AAV5_b2)_reverse         | 467                  |
| 19              | AAV5             | DO_38_(AAV5_b3)_forward         | DO_39_(AAV5_b3)_reverse         | 220                  |
| 20              | AAV5             | DO_40_(AAV5_b4)_forward         | DO_41_(AAV5_b4)_reverse         | 248                  |
| 21              | AAV5             | DO_42_(AAV5_b5)_forward         | DO_43_(AAV5_b5)_reverse         | 204                  |
| 22              | AAV5             | DO_44_(AAV5_b6)_forward         | DO_45_(AAV5_b6)_reverse         | 442                  |
| 23              | AAV5             | DO_46_(AAV5_b7)_forward         | DO_47_(AAV5_b7)_reverse         | 208                  |
| 24              | AAV5             | DO_48_(AAV5_b8)_forward         | DO_19_(AAV2_b8)_reverse         | 298                  |
| 25              | AAV6             | DO_04_(AAV2_b1)_forward         | DO_49_(AAV6_b1)_reverse         | 784                  |
| 26              | AAV6             | DO_50_(AAV6_b2)_forward         | DO_51_(AAV6_b2)_reverse         | 494                  |
| 27              | AAV6             | DO_52_(AAV6_b3)_forward         | DO_53_(AAV6_b3)_reverse         | 220                  |
| 28              | AAV6             | DO_54_(AAV6_b4)_forward         | DO_55_(AAV6_b4)_reverse         | 242                  |
| 29              | AAV6             | DO_56_(AAV6_b5)_forward         | DO_57_(AAV6_b5)_reverse         | 222                  |
| 30              | AAV6             | DO_58_(AAV6_b6)_forward         | DO_59_(AAV6_b6)_reverse         | 433                  |
| 31              | AAV6             | DO_60_(AAV6_b7)_forward         | DO_61_(AAV6_b7)_reverse         | 211                  |
| 32              | AAV6             | DO_62_(AAV6_b8)_forward         | DO_19_(AAV2_b8)_reverse         | 298                  |
| 33              | AAV8             | DO_04_(AAV2_b1)_forward         | DO_63_(AAV8_b1)_reverse         | 784                  |
| 34              | AAV8             | DO_64_(AAV8_b2)_forward         | DO_65_(AAV8_b2)_reverse         | 500                  |
| 35              | AAV8             | DO_66_(AAV8_b3)_forward         | DO_67_(AAV8_b3)_reverse         | 220                  |
| 36              | AAV8             | DO_68_(AAV8_b4)_forward         | DO_69_(AAV8_b4)_reverse         | 242                  |
| 37              | AAV8             | DO_56_(AAV6_b5)_forward         | DO_70_(AAV8_b5)_reverse         | 222                  |
| 38              | AAV8             | DO_71_(AAV8_b6)_forward         | DO_72_(AAV8_b6)_reverse         | 433                  |
| 39              | AAV8             | DO_73_(AAV8_b7)_forward         | DO_74_(AAV8_b7)_reverse         | 211                  |
| 40              | AAV8             | DO_75_(AAV8_b8)_forward         | DO_19_(AAV2_b8)_reverse         | 298                  |
| 41              | AAV9             | DO_04_(AAV2_b1)_forward         | DO_76_(AAV9_b1)_reverse         | 787                  |
| 42              | AAV9             | DO_77_(AAV9_b2)_forward         | DO_51_(AAV6_b2)_reverse         | 491                  |
| 43              | AAV9             | DO_08_(AAV2_b3)_forward         | DO_78_(AAV9_b3)_reverse         | 220                  |
| 44              | AAV9             | DO_79_(AAV9_b4)_forward         | DO_80_(AAV9_b4)_reverse         | 242                  |
| 45              | AAV9             | DO_81_(AAV9_b5)_forward         | DO_82_(AAV9_b5)_reverse         | 219                  |
| 46              | AAV9             | DO_83_(AAV9_b6)_forward         | DO_84_(AAV9_b6)_reverse         | 433                  |
| 47              | AAV9             | DO_85_(AAV9_b7)_forward         | DO_86_(AAV9_b7)_reverse         | 211                  |
| 48              | AAV9             | DO_87_(AAV9_b8)_forward         | DO_34_(AAV4_b8)_reverse         | 298                  |

**Table S5.** Unique block junctures specified during primer design to ensure efficient golden gate assembly.

| <b>Block Identity</b> | <b>Overhang with Previous Block</b> | <b>Overhang with Next Block</b> |
|-----------------------|-------------------------------------|---------------------------------|
| (Vector_Backbone)     | TTGC                                | ATAA                            |
| (AAV2_b1)             | ATAA                                | GAAC                            |
| (AAV2_b2)             | GAAC                                | GGGT                            |
| (AAV2_b3)             | GGGT                                | CTTT                            |
| (AAV2_b4)             | CTTT                                | CTAC                            |
| (AAV2_b5)             | CTAC                                | AACT                            |
| (AAV2_b6)             | AACT                                | AGAC                            |
| (AAV2_b7)             | AGAC                                | TCAT                            |
| (AAV2_b8)             | TCAT                                | TTGC                            |
| (AAV4_b1)             | ATAA                                | GAAC                            |
| (AAV4_b2)             | GAAC                                | GGGT                            |
| (AAV4_b3)             | GGGT                                | CTTT                            |
| (AAV4_b4)             | CTTT                                | CTAC                            |
| (AAV4_b5)             | CTAC                                | AACT                            |
| (AAV4_b6)             | AACT                                | AGAC                            |
| (AAV4_b7)             | AGAC                                | TCAT                            |
| (AAV4_b8)             | TCAT                                | TTGC                            |
| (AAV5_b1)             | ATAA                                | GAAC                            |
| (AAV5_b2)             | GAAC                                | GGGT                            |
| (AAV5_b3)             | GGGT                                | CTTT                            |
| (AAV5_b4)             | CTTT                                | CTAC                            |
| (AAV5_b5)             | CTAC                                | AACT                            |
| (AAV5_b6)             | AACT                                | AGAC                            |
| (AAV5_b7)             | AGAC                                | TCAT                            |
| (AAV5_b8)             | TCAT                                | TTGC                            |
| (AAV6_b1)             | ATAA                                | GAAC                            |
| (AAV6_b2)             | GAAC                                | GGGT                            |
| (AAV6_b3)             | GGGT                                | CTTT                            |
| (AAV6_b4)             | CTTT                                | CTAC                            |
| (AAV6_b5)             | CTAC                                | AACT                            |
| (AAV6_b6)             | AACT                                | AGAC                            |
| (AAV6_b7)             | AGAC                                | TCAT                            |
| (AAV6_b8)             | TCAT                                | TTGC                            |
| (AAV8_b1)             | ATAA                                | GAAC                            |
| (AAV8_b2)             | GAAC                                | GGGT                            |
| (AAV8_b3)             | GGGT                                | CTTT                            |
| (AAV8_b4)             | CTTT                                | CTAC                            |
| (AAV8_b5)             | CTAC                                | AACT                            |
| (AAV8_b6)             | AACT                                | AGAC                            |
| (AAV8_b7)             | AGAC                                | TCAT                            |
| (AAV8_b8)             | TCAT                                | TTGC                            |
| (AAV9_b1)             | ATAA                                | GAAC                            |
| (AAV9_b2)             | GAAC                                | GGGT                            |
| (AAV9_b3)             | GGGT                                | CTTT                            |
| (AAV9_b4)             | CTTT                                | CTAC                            |
| (AAV9_b5)             | CTAC                                | AACT                            |
| (AAV9_b6)             | AACT                                | AGAC                            |
| (AAV9_b7)             | AGAC                                | TCAT                            |
| (AAV9_b8)             | TCAT                                | TTGC                            |
